# Supplementary material for: 5-Hydroxymaltol Derived from Beetroot Juice through Lactobacillus Fermentation Suppresses Inflammatory Effect and Oxidant Stress via Regulating NF-kB, MAPKs Pathway and NRF2/HO-1 Expression
Source: MDPI journal article supplement (doi:10.3390/antiox10081324), 2021-08-23
Supplement: s1 [file s1]

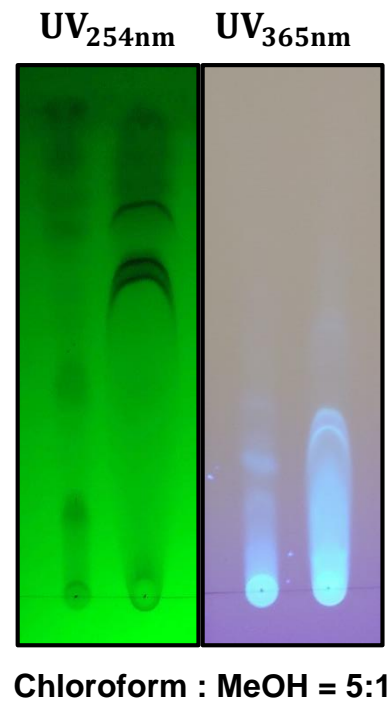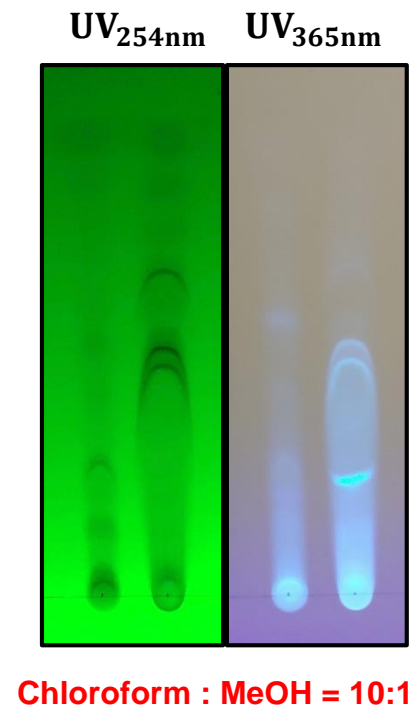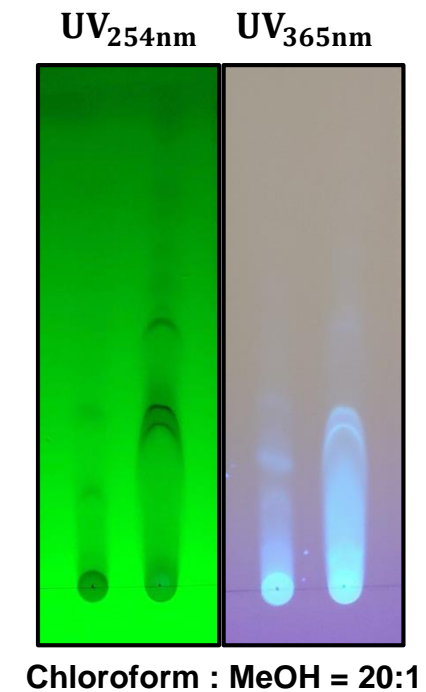

**Supplementary Figure S1. Purification procedure of antioxidant from beet fermentation by *Lactobacillus* using ethylacetate extraction (fermentated solution: ethylacetate=1:1)**

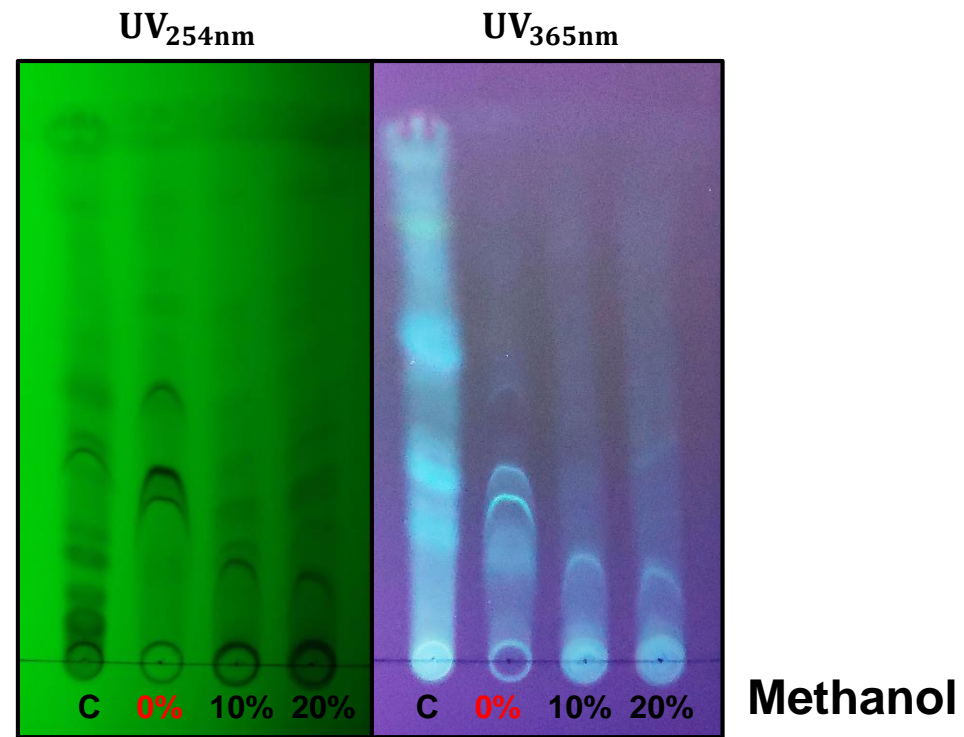

**Supplementary Figure S2. Purification procedure of antioxidant from beet fermentation by *Lactobacillus* using ODS (C-18) chromatography. TLC plate analysis of the purified sample. Active fraction; 0% methanol.**

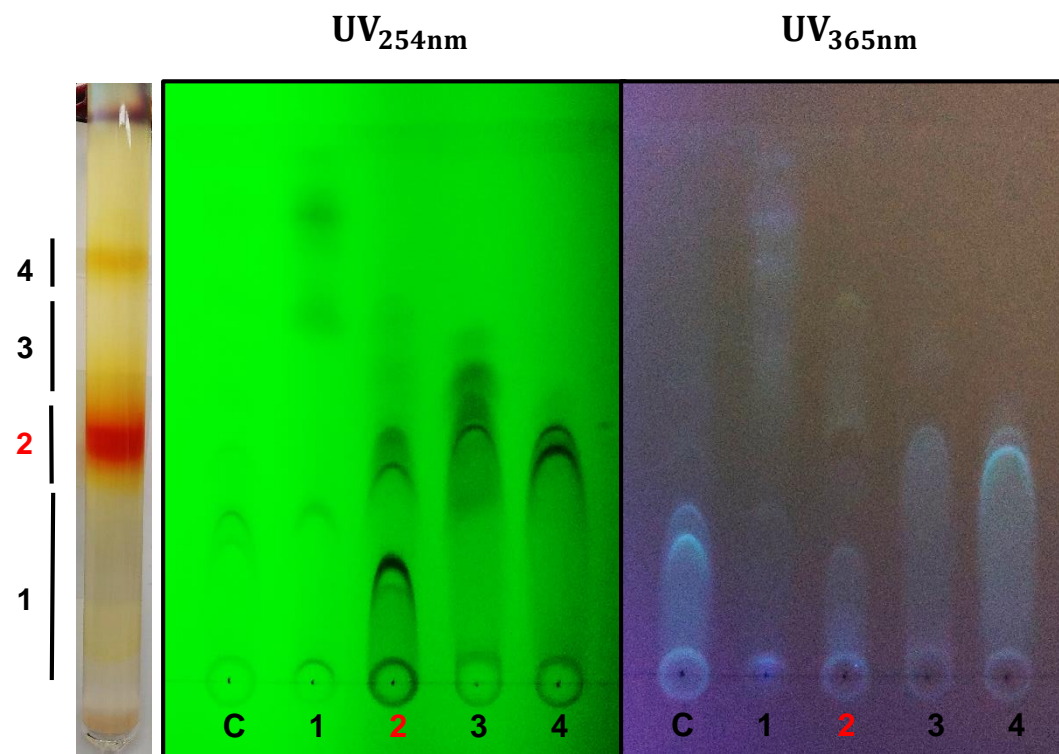

**Supplementary Figure S3. Purification procedure of antioxidant from beet fermentation by *Lactobacillus* using Silica gel chromatography eluted with  $CHCl_3$  : MeOH (10:1). TLC plate analysis of the purified sample. Active fraction; #2.**

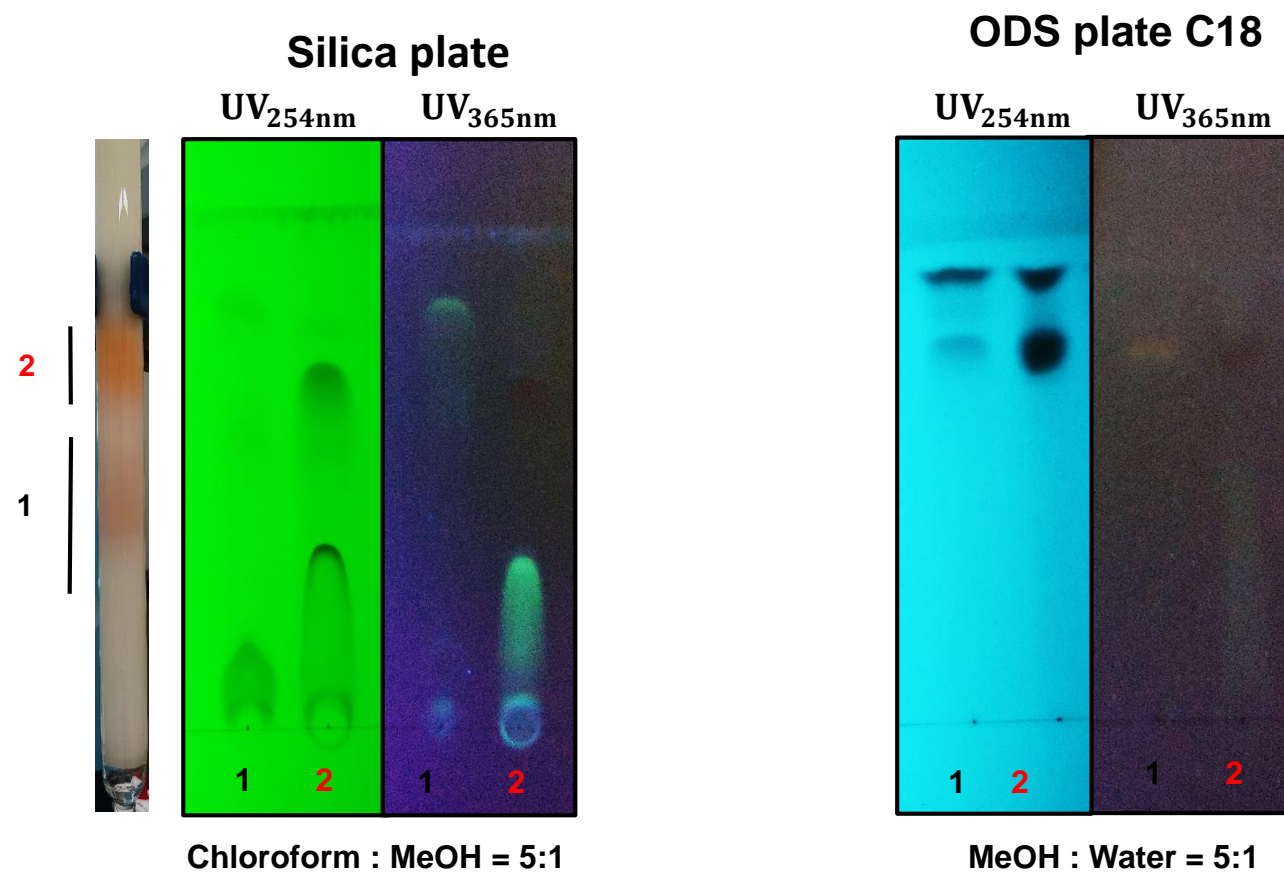

**Supplementary Figure S4. Purification procedure of antioxidant from beet fermentation by *Lactobacillus* using Sephadex G-10 with water. TLC plate analysis of the purified sample. Active fraction; #2.**

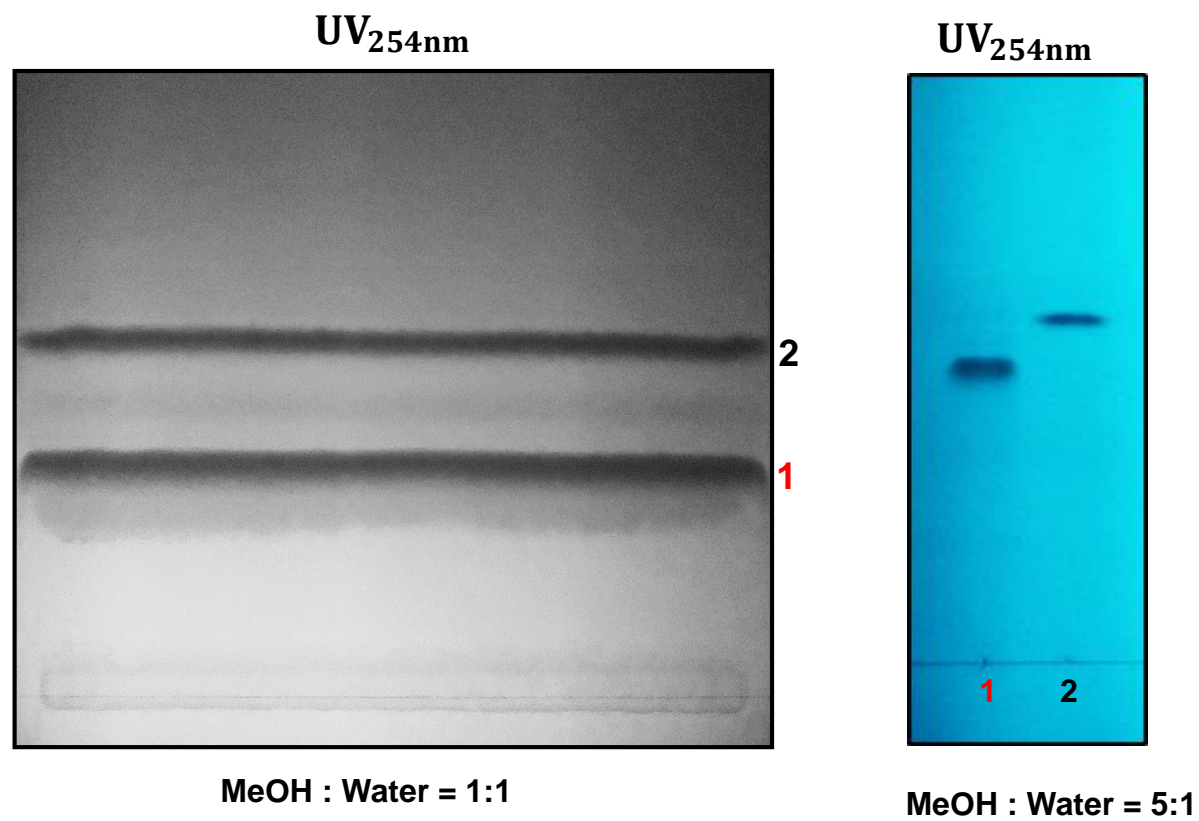

**Supplementary Figure S5. Purification procedure of antioxidant from beet fermentation by *Lactobacillus* using C-18 Prep TLC. TLC plate analysis of the purified sample. Active fraction; #1.**

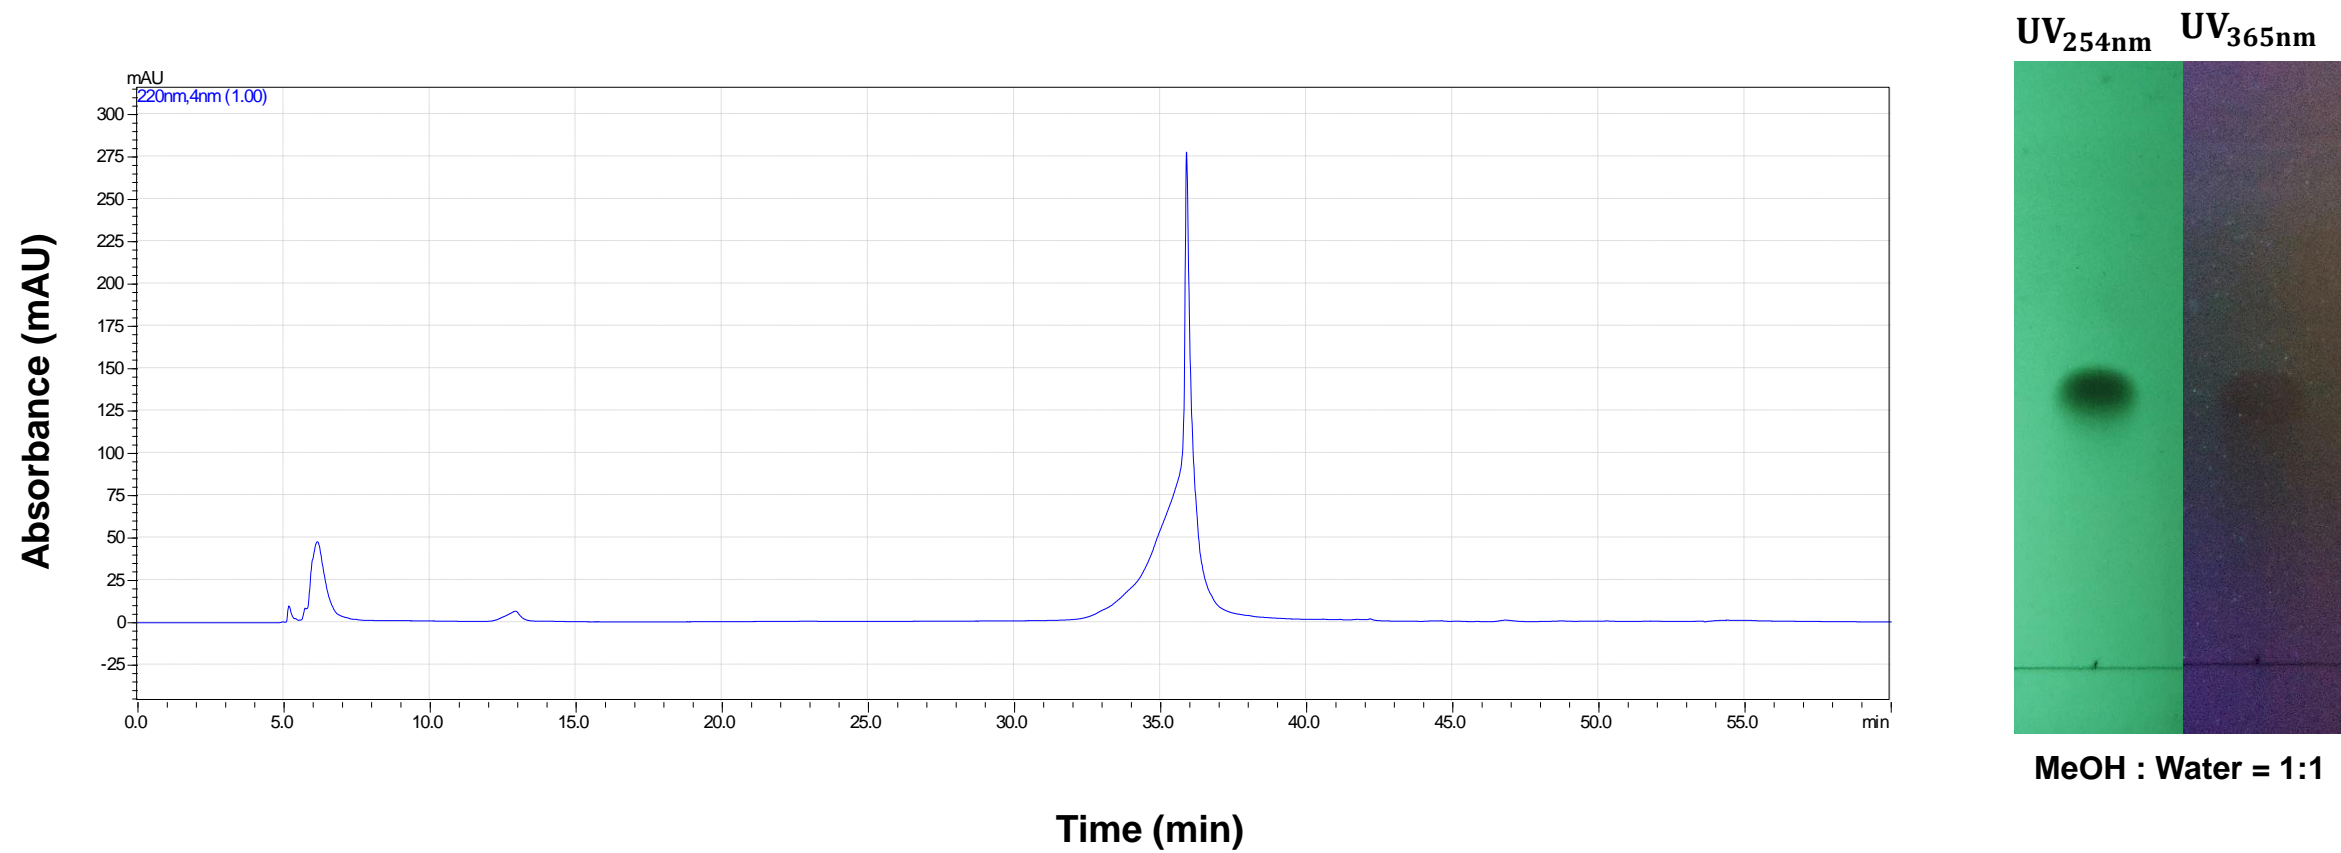

**Supplementary Figure S6. Purification procedure of antioxidant from beet fermentation by *Lactobacillus* using Prep HPLC with ACN.**

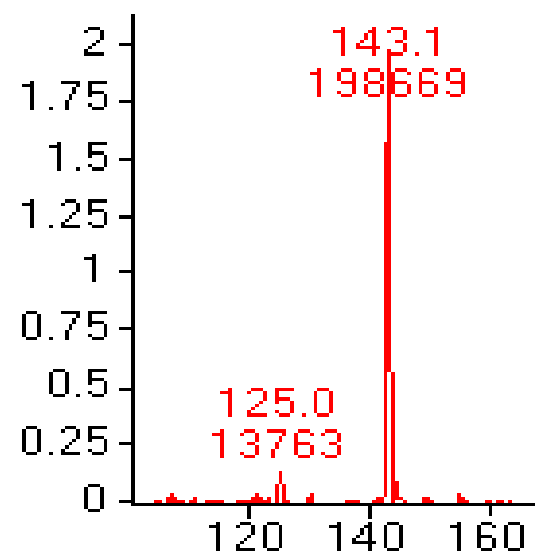

**Supplementary Figure S7. ESI-mass spectrometry of the purified sample.**

## $^1\text{H}$ NMR

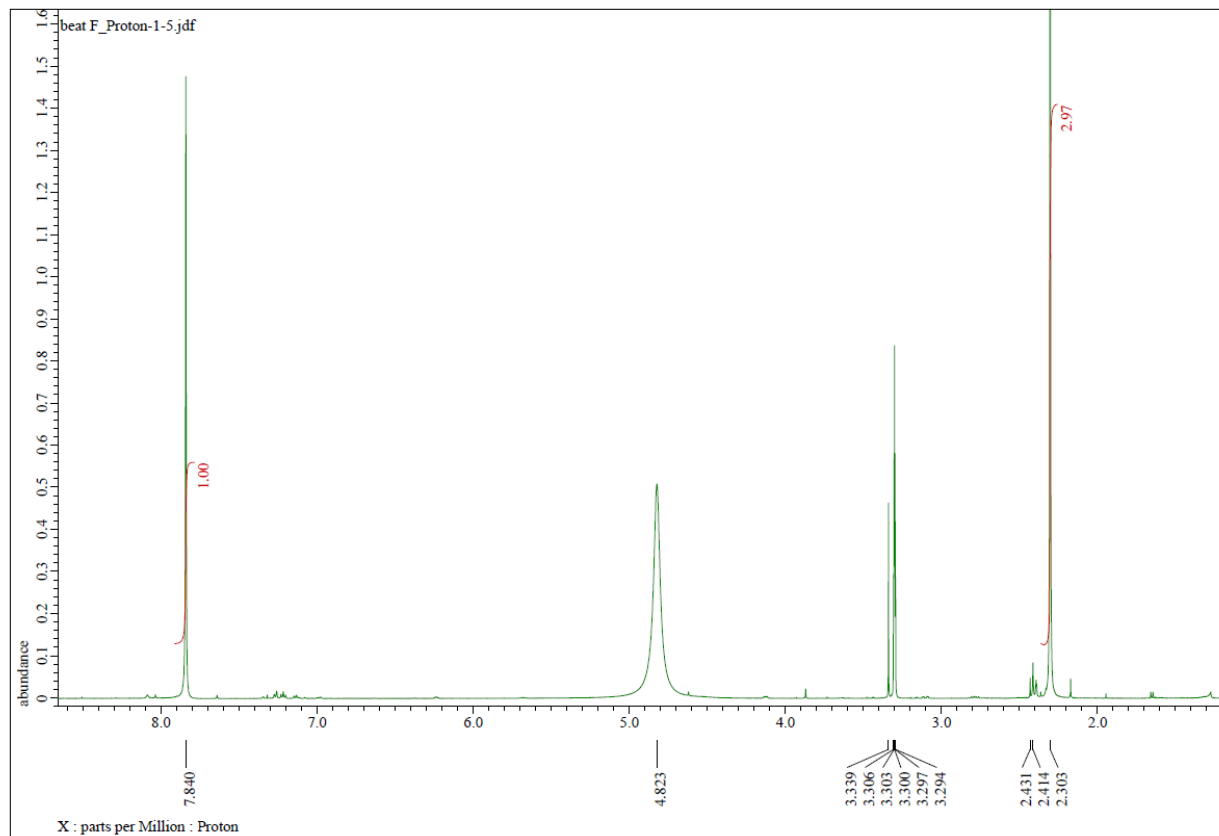

## $^{13}\text{C}$ NMR

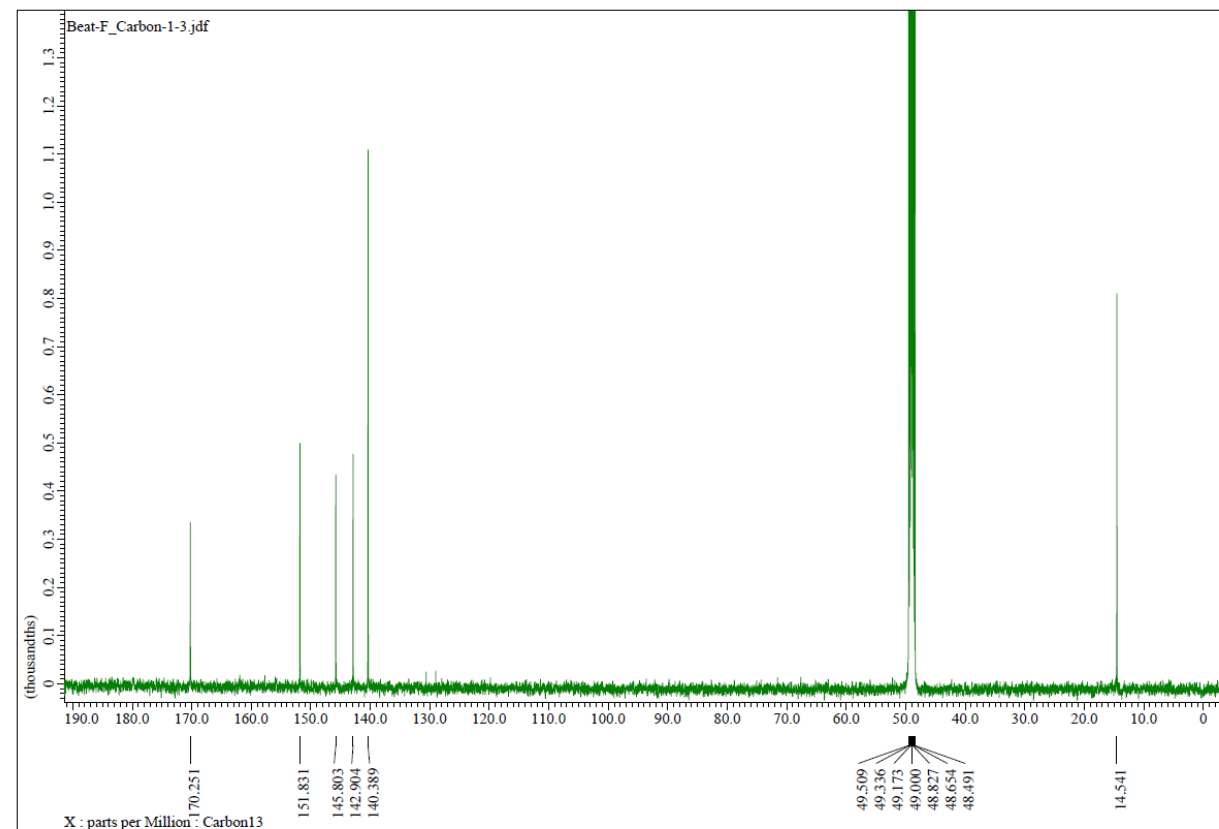

Supplementary Figure S8.  $^1\text{H}$  NMR and  $^{13}\text{C}$  NMR spectra of the purified sample.



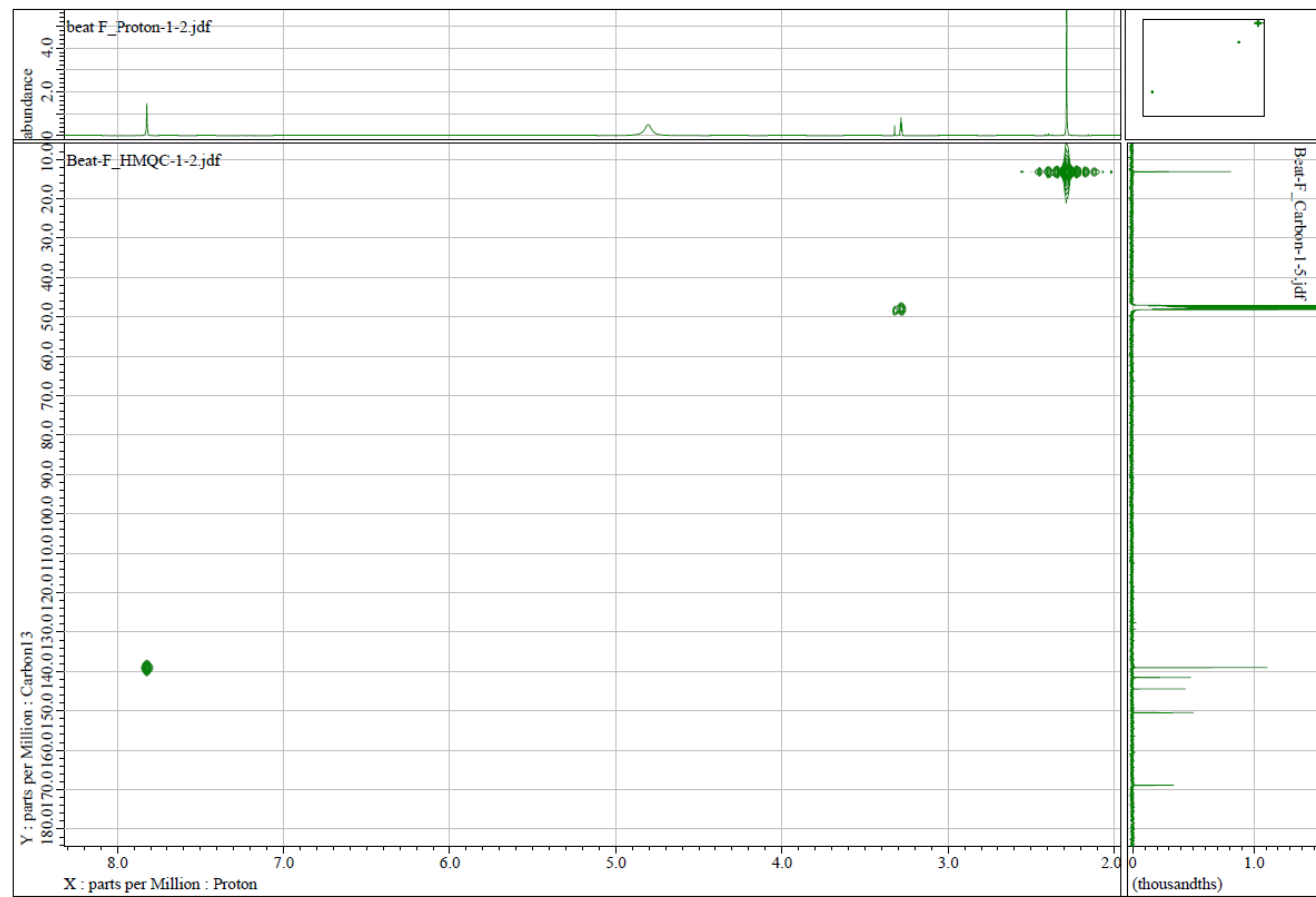

**Supplementary Figure S9. HMQC spectrum of the purified sample**

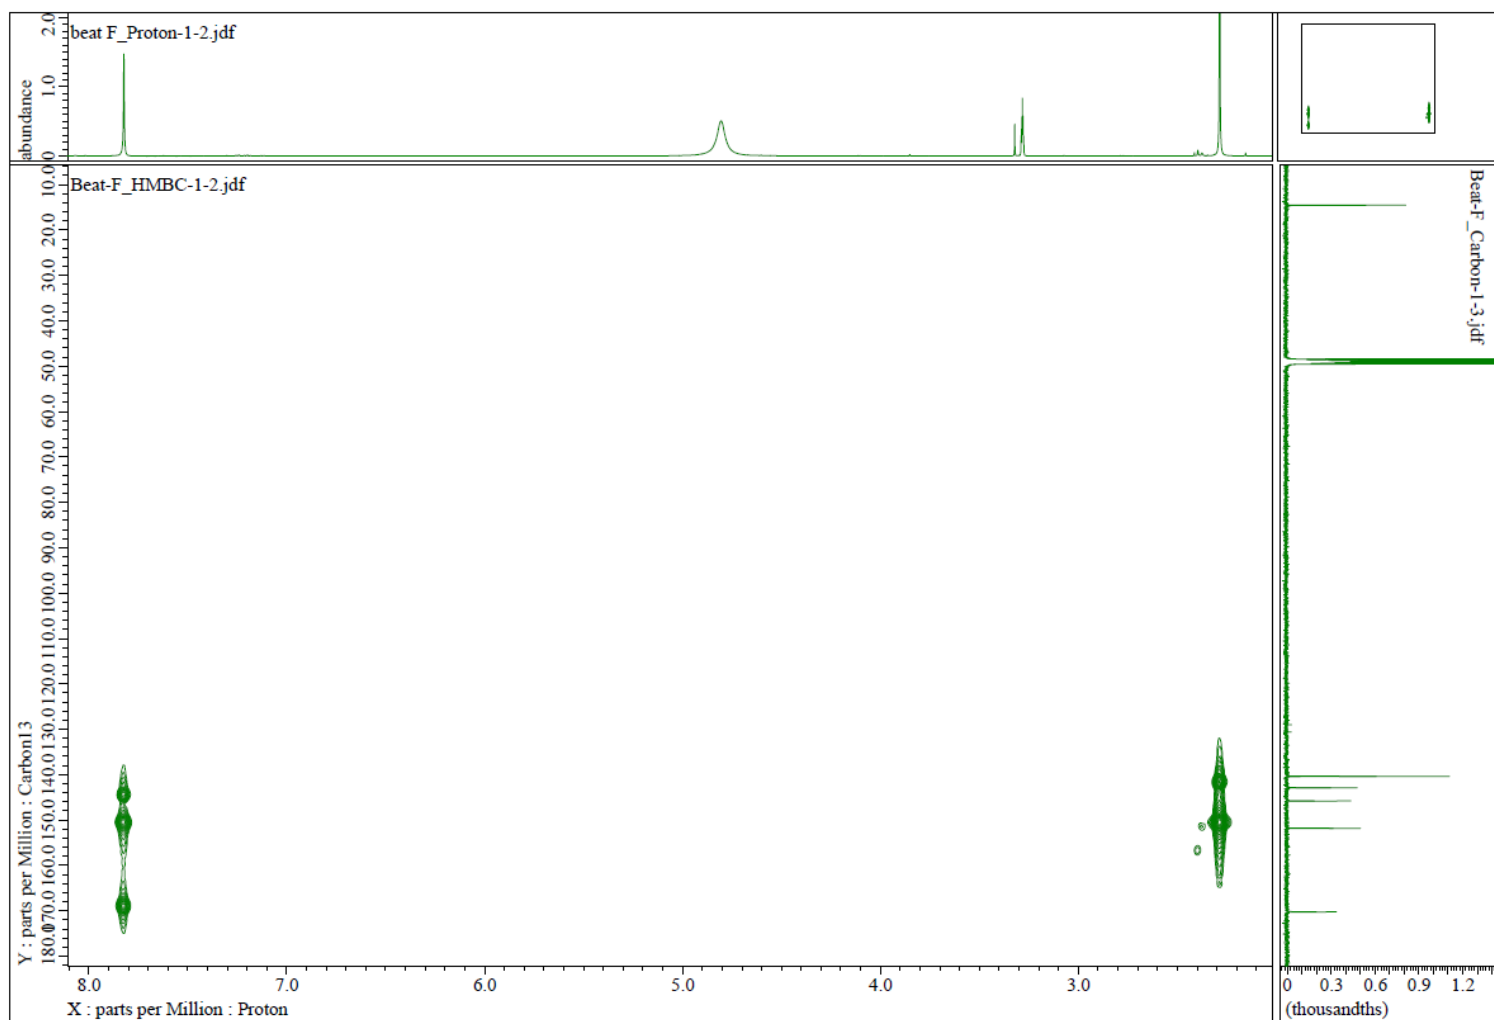

**Supplementary Figure S10. HMBC spectrum of the purified sample.**

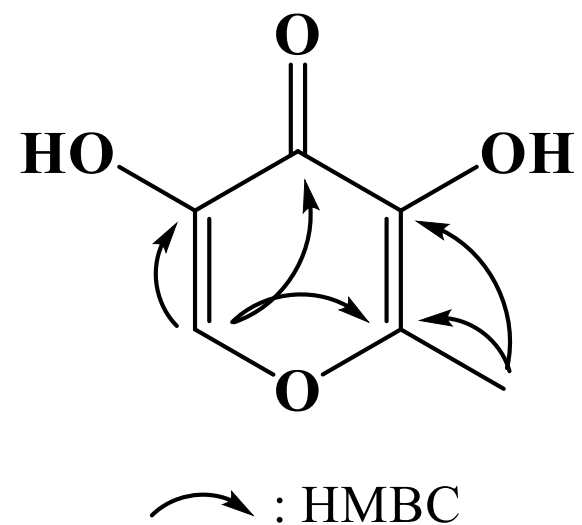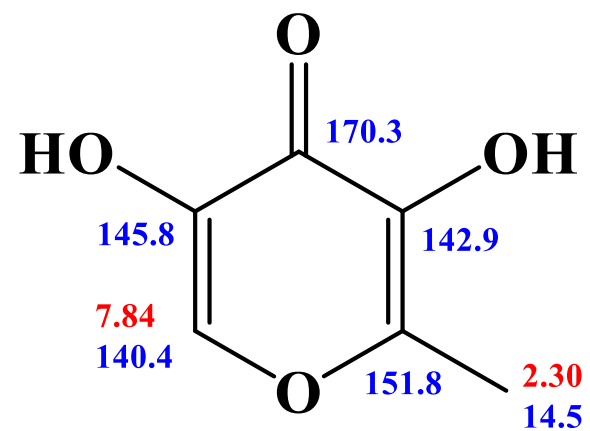

Supplementary Figure S11. HMBC correlations and  $^1\text{H}$  (red) and  $^{13}\text{C}$  (blue) peaks assignments of the purified sample.
